# Supplementary material
Source: PubMed Central journal article supplement (PMC3273394)
Supplement: emboj2011422s1.pdf [file emboj2011422s1.pdf]

SUPPLEMENTARY FIGURE S1

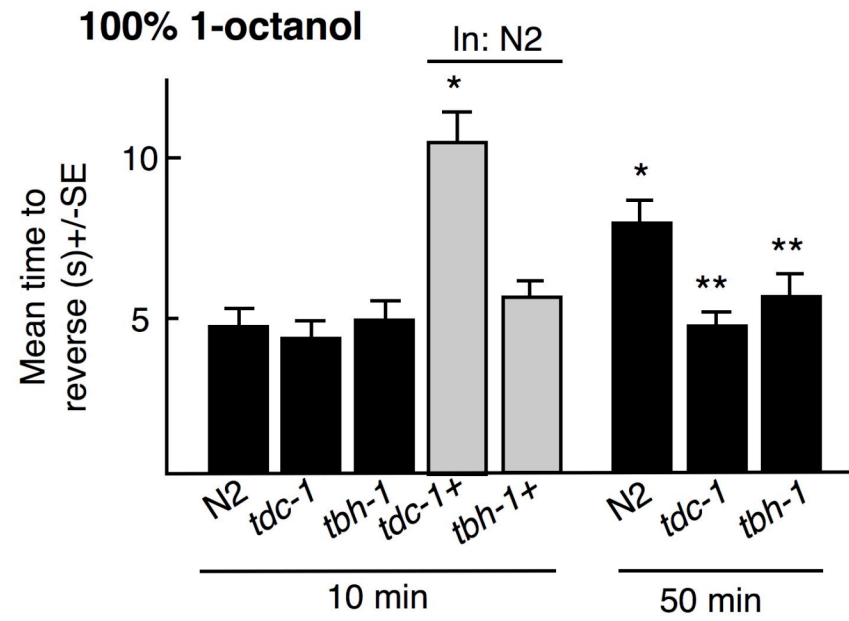

**Supplementary Figure S1. The starvation-dependent inhibition of ASH-mediated aversive responses to 100% 1-octanol requires TA and OA.** Wild type and mutant animals were incubated for 10 or 50 min in the absence of food and were examined for aversive responses to 100% 1-octanol, as described in Methods. Data are presented as a mean  $\pm$  SE and analyzed by two-tailed Student's *t* test. \**P* < 0.001, significantly different from wild type animals at 10 min; \*\*, significantly different from wild type animals at 50 min.

**Confocal microscopy.** Transcriptional and translational transgenes for *ser-6::ser-6::gfp*, *ser-3::ser-3::gfp*, *npr-15::npr-15::gfp* and *npr-18::gfp* were generated by PCR fusion (Hobert, 2002). PCR products were pooled from at least 3 separate PCR reactions and co-injected with a selectable marker (*punc-122::rfp* or *rol-6*) by standard techniques. Uptake of 1,1'-dioctadecyl-3,3,3',3'-tetramethylindodicarbocyanine (DiD) was assayed as described (Kramer *et al.*, 1990). At least three transformed lines were analyzed for *gfp* fluorescence and DiD staining using an Olympus confocal microscope.

**Generation of RNAi strains by bacterial feeding.** RNA interference was performed as previously described in *eri-1* (kp3948) animals (Kamath and Ahringer, 2003). All animals were cultured at 16°C. Synchronized second generation L4s were picked 24 hr pre-assay and examined for octanol sensitivity. The following RNAi animals were generated through feeding: *nlp-8*, *npr-20*, *r106.2*, *f5510.7*, *zc84.4*, *ckr-1*, *c50f7.1*, *t02d1.6*, and *y116a8b.5*.

## References

Hobert O (2002) PCR fusion-based approach to create reporter gene constructs for expression analysis in transgenic *C. elegans*. *Biotechniques* **32**:728-730.

Kamath RS, Ahringer J (2003) Genome-wide RNAi screening in *Caenorhabditis elegans*. *Methods* **30**:313-321.

Kramer JM, French RP, Park EC, Johnson JJ (1990) The *Caenorhabditis elegans* rol-6 gene, which interacts with the sqt-1 collagen gene to determine organismal morphology, encodes a collagen. *Mol Cell Biol* **10**:2081-2089.
